# Supplementary material
Source: publisher figshare collection journal article supplement (https://frontiersin.figshare.com/ndownloader/files/31624625)
Supplement: Supplementary file [file 31624625]

## *Supplementary Material*

### **Multimodal imaging in cardiovascular infections: the case of the infectious complications after Bentall procedure.**

**M. Sollini<sup>1,2</sup>, F. Bartoli<sup>3</sup>, R. Boni<sup>4</sup>, R. Zanca<sup>3</sup>, A. Colli<sup>5</sup>, M. Levantino<sup>5</sup>, F. Menichetti<sup>6</sup>, M. Ferrari<sup>7</sup>, R. Berchiolli<sup>7</sup>, E. Lazzeri<sup>3</sup> and P. A. Erba<sup>3,7</sup>**

- (1) Department of Biomedical Sciences, Humanitas University, Via Rita Levi Montalcini 4, 20090 Pieve Emanuele, Italy
- (2) IRCCS Humanitas Research Hospital, Rozzano (Milan), Italy
- (3) Regional Center of Nuclear Medicine, Department of Translational Research and New Technology in Medicine, University of Pisa, and Azienda Ospedaliero Universitaria Pisana, Pisa, Italy
- (4) UOC Medicina Nucleare, ASST Papa Giovanni XXIII, Bergamo
- (5) Division of Cardiovascular Surgery Department of Surgical, Medical and Molecular Pathology and Critical Care University of Pisa and Azienda Ospedaliero Universitaria Pisana, Pisa, Italy
- (6) Infectious Diseases Unit, Department of Clinical and Experimental Medicine University of Pisa and Azienda Ospedaliera Universitaria Pisana
- (7) Vascular surgery, Department of Translational Research and Advanced Technology in Medicine, University of Pisa, and Azienda Ospedaliero Universitaria Pisana, Pisa, Italy
- (8) Department of Nuclear Medicine and Molecular Imaging, Medical Imaging Centre, University Medical Center Groningen, Groningen, The Netherlands

**\* Correspondence:**

Paola Anna Erba, MD, PhD

Associated Professor in Nuclear Medicine

Department of Translational research and New Technology in Medicine.

Via Savi 10, 56126 Pisa, Italy

Tel: +39-050-992115

Fax: +39-050-992124

E-mail: [p.erba@unipi.it](mailto:p.erba@unipi.it)

[University of Pisa](#)

Supplementary Table 1: Comparative assessment of the Duke criteria ESC criteria and the New Bentall 2020 criteria in the 76 patients

|                                     | <b>ESC 2015<br/>Definite<br/>(n=23)</b> | <b>High AVTG<br/>Index (n=56)</b> | <b>ESC 2015<br/>Possible (n<br/>=18)</b> | <b>ESC 2015<br/>Rejected<br/>(n=35)</b> | <b>Very Low<br/>AVTG Index<br/>(n=20)</b> |
|-------------------------------------|-----------------------------------------|-----------------------------------|------------------------------------------|-----------------------------------------|-------------------------------------------|
| <b>Duke Definite<br/>(n=11)</b>     | 11                                      | 11                                | -                                        | -                                       | -                                         |
| <b>Duke Possible<br/>(n=35)</b>     | 9                                       | 25                                | 17                                       | 8                                       | 2                                         |
| <b>Duke<br/>Rejected<br/>(n=30)</b> | 3                                       | 20                                | 1                                        | 27                                      | 18                                        |
